# Supplementary material for: IRF7-deficient MDCK cell based on CRISPR/Cas9 technology for enhancing influenza virus replication and improving vaccine production
Source: PeerJ. 2022 Sep 21;10:e13989. doi: 10.7717/peerj.13989 (PMC9508885; doi:10.7717/peerj.13989)
Supplement: Supplemental Information 3 — The Ct values obtained from RT-qPCR were used for the calculation of IRF7 gene expression and influenza viral titers. The results were illustrated as Figs. 2 and 4, respectively. [file peerj-10-13989-s003.xlsx]

## Sheet: Data for Fig 2A
				GAPDH	GAPDH				IRF7	IRF7
	GAP-1	GAP-2	GAP-3	mean ct	SD	IRF7-1	IRF7-2	IRF7-3	mean ct	SD	ΔCt-1	ΔCt-2	ΔCt-3		ΔΔCt-1	ΔΔCt-2	ΔΔCt-3	fold change	fold change	fold change
2066 uninfect	18.55	20.523	18.556	19.021	1.137	31.8829	32.4695	31.758	32.0368	0.379903	13.3329	11.9465	13.202		5.13105	3.53916	4.55381	0.0285364	0.0860213	0.0425762
WT uninfect	18.988	19.003	18.885	18.959	0.064	27.1898	27.4103	27.5332	27.3778	0.17397	8.20182	8.40732	8.64816
																	%expression	2.85364	8.60213	4.25762
																	mean	5.2378
																	SD	2.99697
2066 infect	20.96	20.907	21.017	20.961	0.055	35.9487	33.7157	33.1865	34.2836	1.46605	14.9887	12.8087	12.1695		6.78685	4.40133	3.52135	0.00905639	0.0473224	0.0870898
																	%expression	0.905639	4.73224	8.70898
																	mean	4.78229
																	SD	3.90191
WT infect	19.9	19.94	19.974	19.938	0.037	30.75	30.3941	30.47	30.538	0.187451	10.85	10.4541	10.496		2.6482	2.04682	1.84781	0.159519	0.242018	0.277814
																	%expression	15.9519	24.2018	27.7814
																	mean	22.645
																	SD	6.06642

## Sheet: Data for Fig 2B
Condition	IRF7 signal	GAPDH signal	IRF7/GAPDH	% compared to normal uninfected	IRF7-2 signal	GAPDH-2 signal	IRF7-2/GAPDH-2	% compared to normal uninfected	mean	sd	p-value
IRF KO uninfected	41.8	113.436	0.36849	55.9889	15.989	166.491	0.0960352	34.3126	0.451507	0.153274	0.0034
IRF KO Flu B	42.2	86.701	0.48673	73.9545	19.956	115.907	0.172173	61.5159	0.677352	0.0879545	0.0031
Normal uninfected	63.2	96.027	0.658148	100	38.33	136.95	0.279883	100	1	0
Normal Flu B	44.2	49.905	0.885683	134.572	63.903	80.882	0.790077	282.288	2.0843	1.04451	1.466

## Sheet: Data for Fig 4A-4B
Sample Name	Target Name	Cт	Quantity	Quantity Mean	Quantity SD	t.test
pH1N1_IRF7-/-	FluA	16.6071	11703889	11622569	449795	4.81223e-06
		16.706	11137662	11622569	449795
		16.5529	12026158	11622569	449795
pH1N1_wt	FluA	19.9306	2.21025e+06	2312377	176815
		19.9305	2210332	2312377	176815
		19.6718	2516545	2312377	176815
B/Yam_IRF7-/-	FluB	11.3857	2290977280	2345561600	63523808	1.49594e-05
		11.3624	2330419456	2345561600	63523808
		11.3137	2415288320	2345561600	63523808
B/Yam_WT	FluB	12.3105	1162414848	1214410496	45362732
		12.228	1234920064	1214410496	45362732
		12.2159	1245896448	1214410496	45362732

## Sheet: Data for Fig 4C-4D
Sample Name	HA unit	Mean	SD	p-value
pH1N1_IRF7-/-	16	16	0	<0.001
	16
	16
pH1N1_wt	4	4	0
	4
	4
B/Yam_IRF7-/-	128	128	0	<0.001
	128
	128
B/Yam_WT	64	64	0
	64
	64
